# Supplementary material for: Performance evaluation of the balanced force field ff03CMAP for intrinsically disordered and ordered proteins
Source: Royal Society of Chemistry journal article supplement (doi:10.1039/d2cp04501j), 2022-01-01
Supplement: d2cp04501j1.pdf [file d2cp04501j1.pdf]

## Supporting information

### Performance Evaluation of Balanced Force Field ff03CMAP for Intrinsically Disordered and Ordered Proteins

Yuxin Jiang<sup>1</sup>, Hai-Feng Chen<sup>1,2, \*</sup>

<sup>1</sup>State Key Laboratory of Microbial metabolism, Joint International Research Laboratory of Metabolic & Developmental Sciences, Department of Bioinformatics and Biostatistics, National Experimental Teaching Center for Life Sciences and Biotechnology, School of Life Sciences and Biotechnology, Shanghai Jiao Tong University, Shanghai, 200240, China

<sup>2</sup>Shanghai Center for Bioinformation Technology, 200240, Shanghai, China.

#### **\*Corresponding Author**

#### **Hai-Feng Chen (Full Professor)**

State Key Laboratory of Microbial metabolism, Joint International Research Laboratory of Metabolic & Developmental Sciences, Department of Bioinformatics and Biostatistics, National Experimental Teaching Center for Life Sciences and Biotechnology, School of Life Sciences and Biotechnology, Shanghai Jiao Tong University, Shanghai, 200240, China

**Tel:** 86-21-34204073; **Fax:** 86-21-34204073; **Email:** haifengchen@sjtu.edu.cn

#### **Notes**

The authors declare that there is no conflict of interest.

A

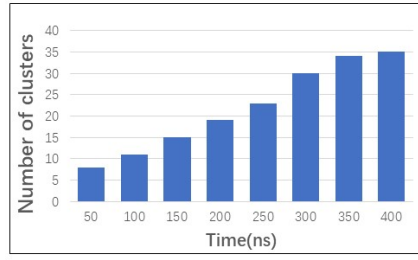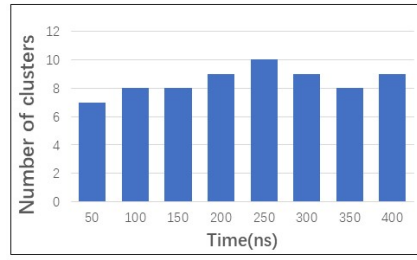

B

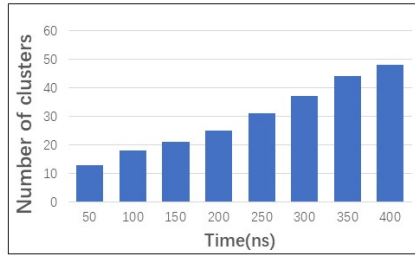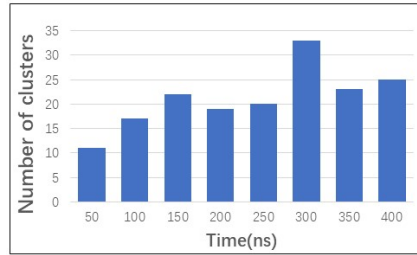

C

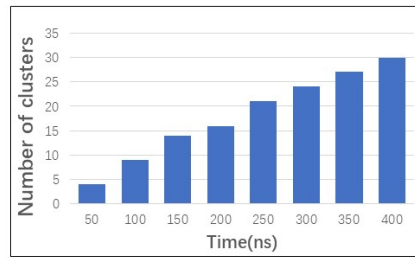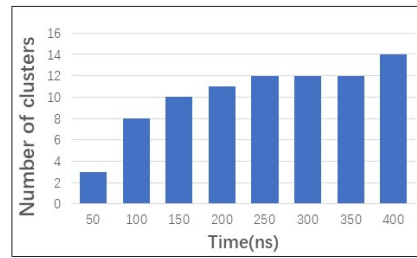

D

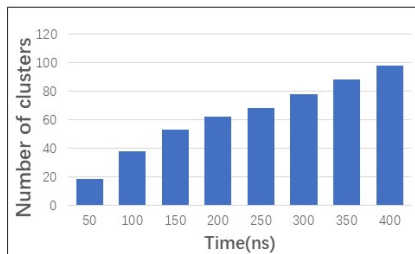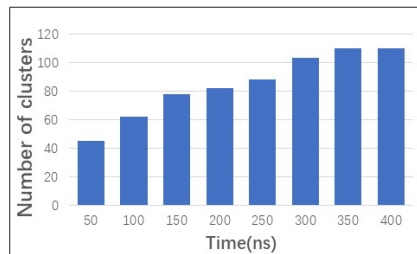

E

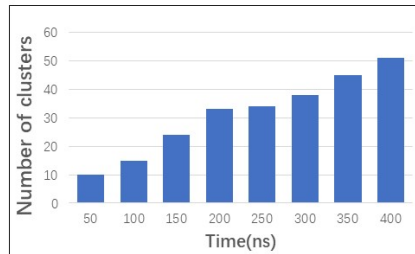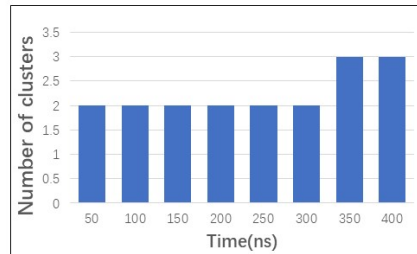

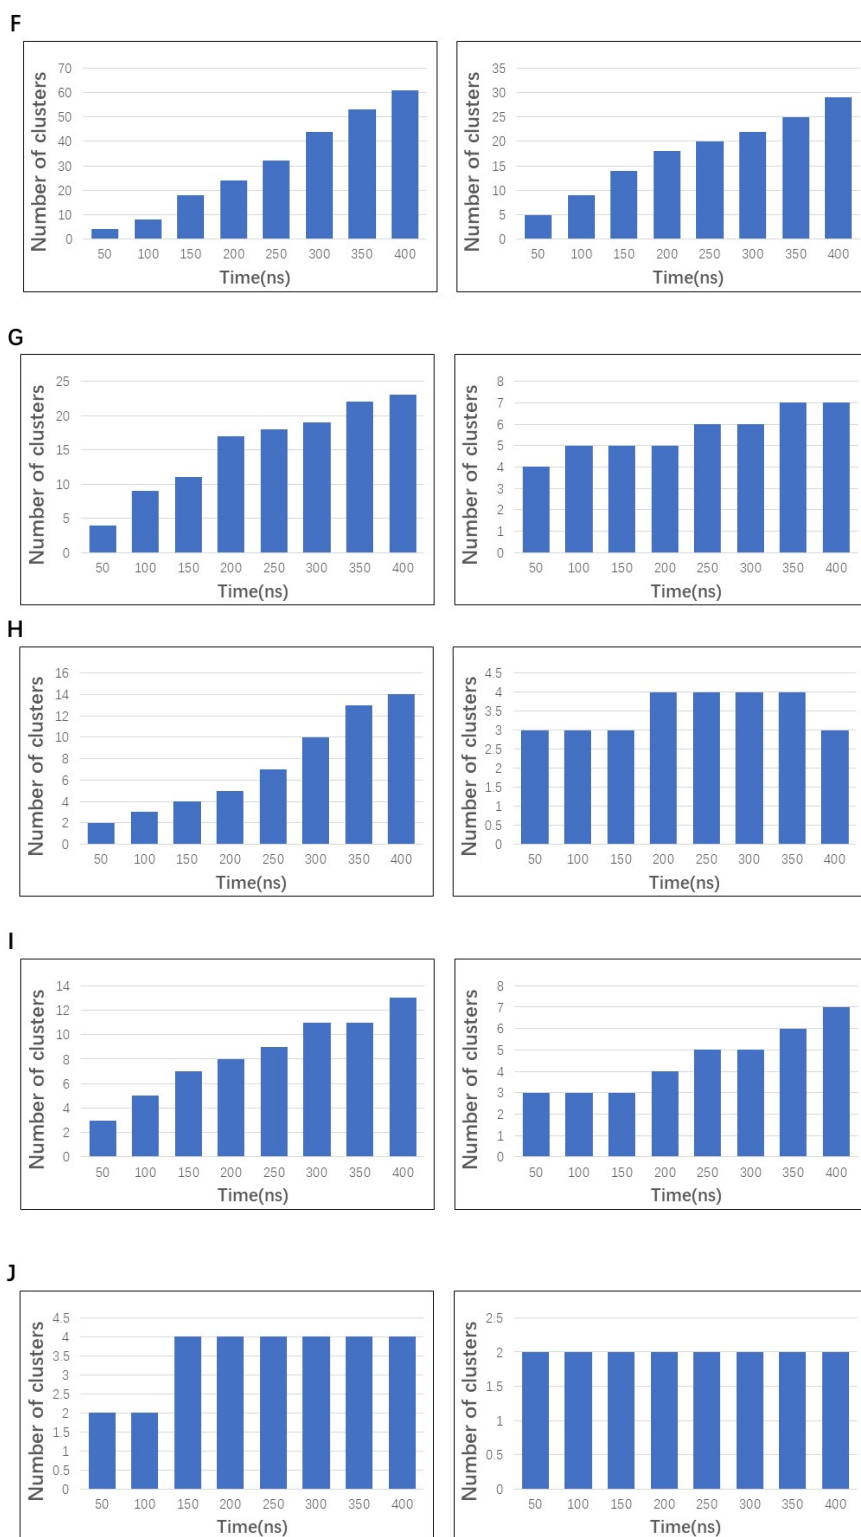

**Figure S1.** Time-dependent cumulative numbers of conformational clusters. The number of conformational clusters at a certain time is calculated with the simulated ensembles from 0 ns to this certain time. The left panel stands for ff03cmap and the right panel stands for ff03 (a) drkN (b) Sic1 (c)PaaA2 (d)p15<sup>PAF</sup> (e)Histain5 (f)synuclein (g)hIAPP (h)MeVN (i)2kpp (j)2krk

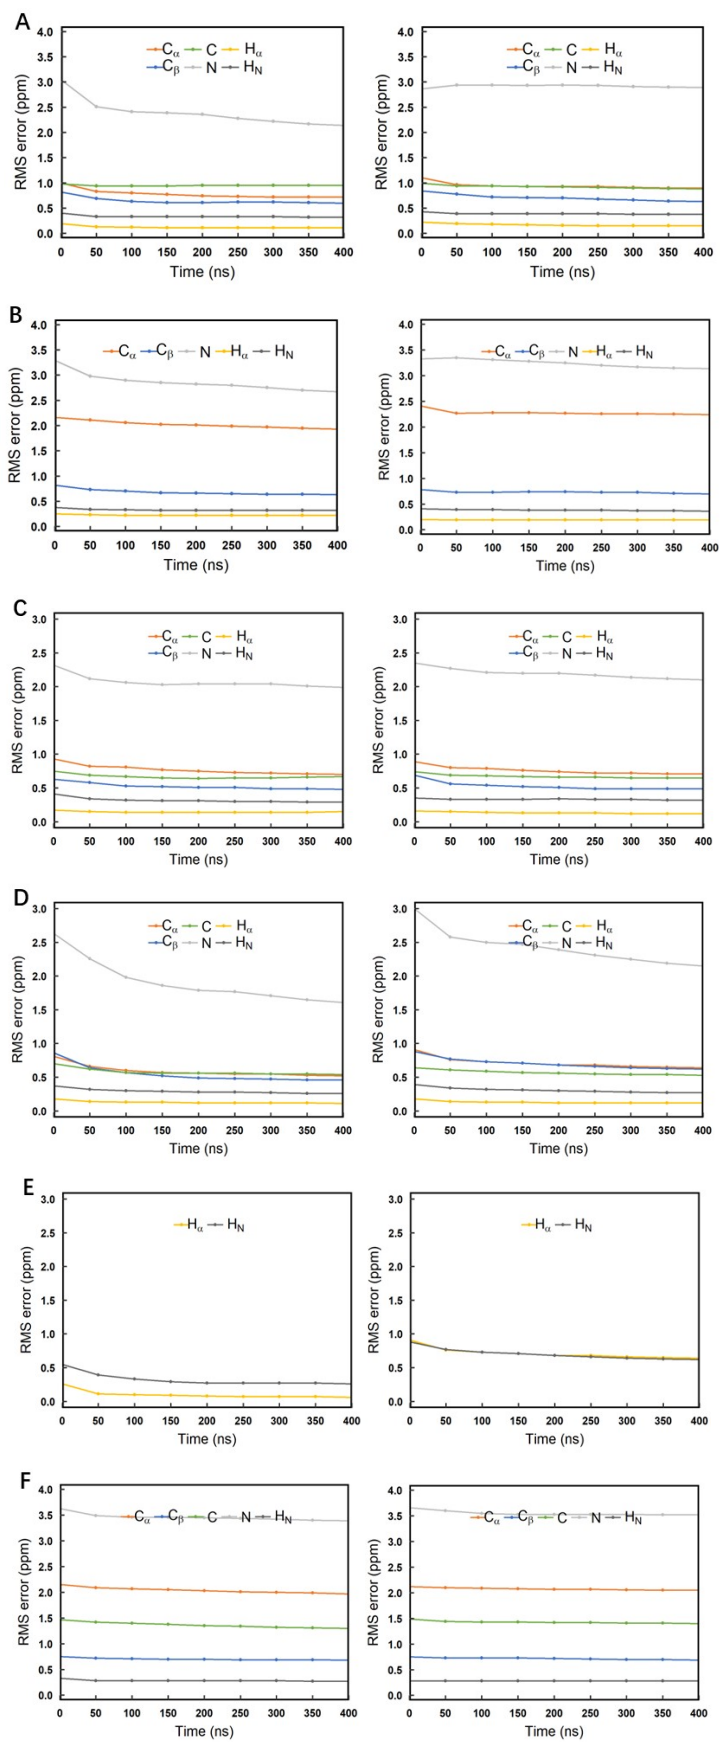

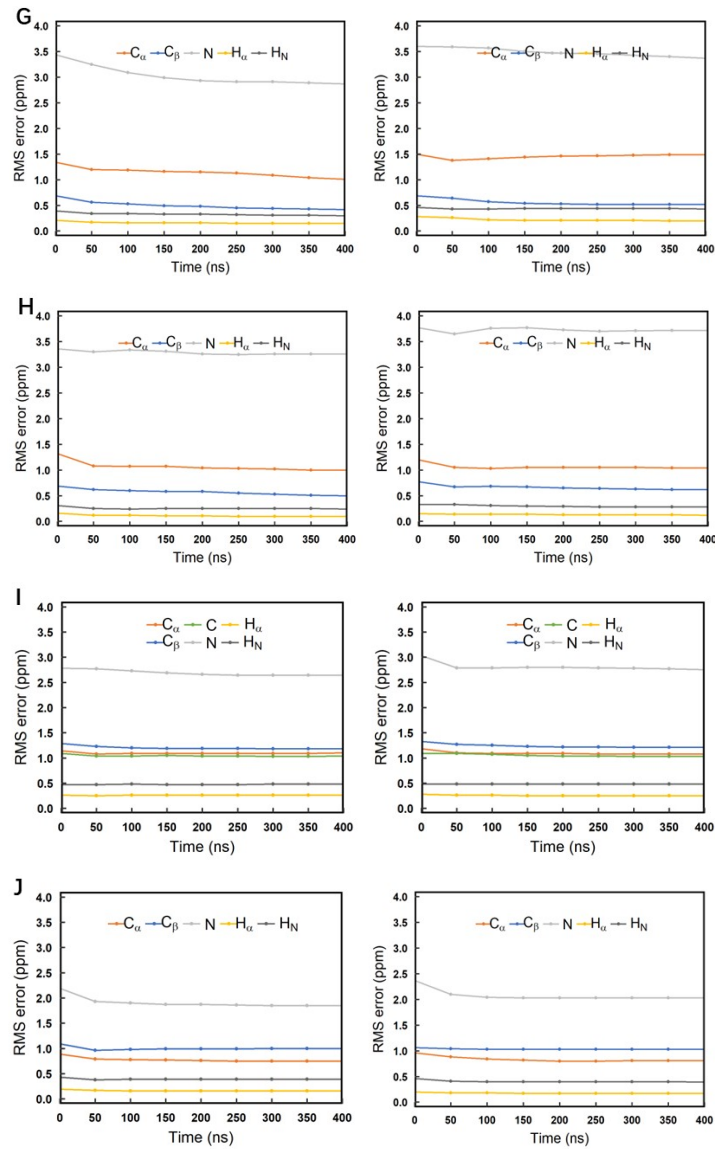

**Figure S2.** Time-dependent RMS error between experimental data and cumulative average chemical shifts simulated. The left panel stands for ff03cmap and the right panel stands for ff03 (a) drkN (b) Sic1 (c)PaaA2 (d)p15<sup>PAF</sup> (e)Histain5 (f)synuclein (g)hIAPP (h)MeVN (i)2kpp (j)2krk

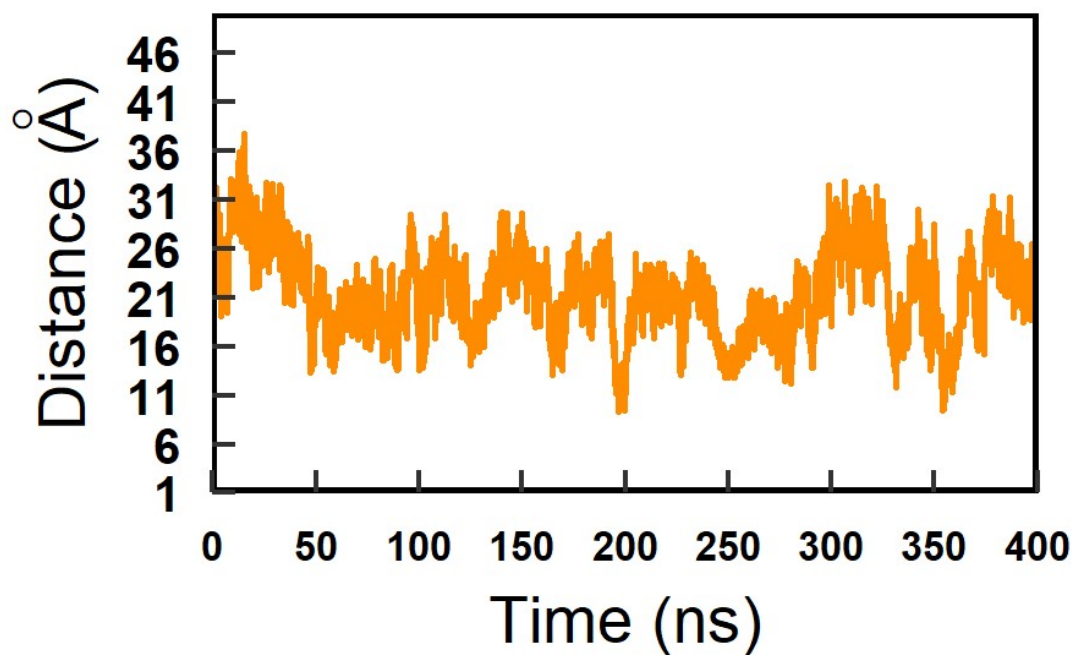

**Figure S3.** The end-to-end distance of this Histain5 during MD.

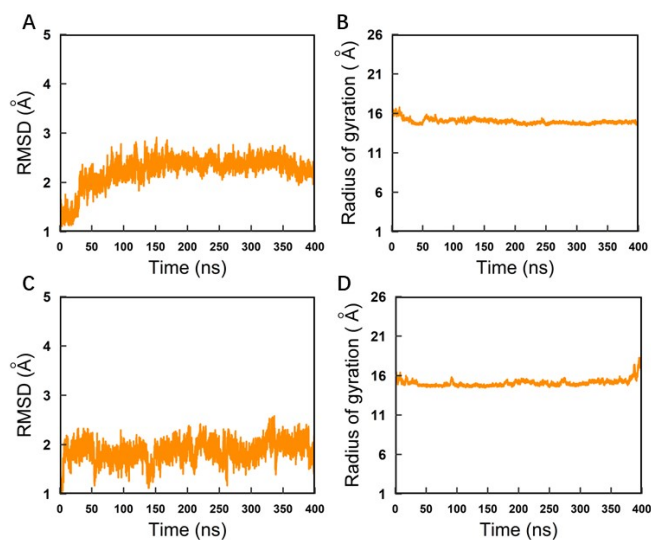

**Figure S4.** Structure stability of folded proteins 2kpp in simulations with the ff03cmap and ff03 force field. (A) The RMSD of 2kpp with ff03cmap (B) The Rg of 2kpp with ff03cmap (C) The RMSD of 2kpp with ff03 (D) The Rg of 2kpp with ff03

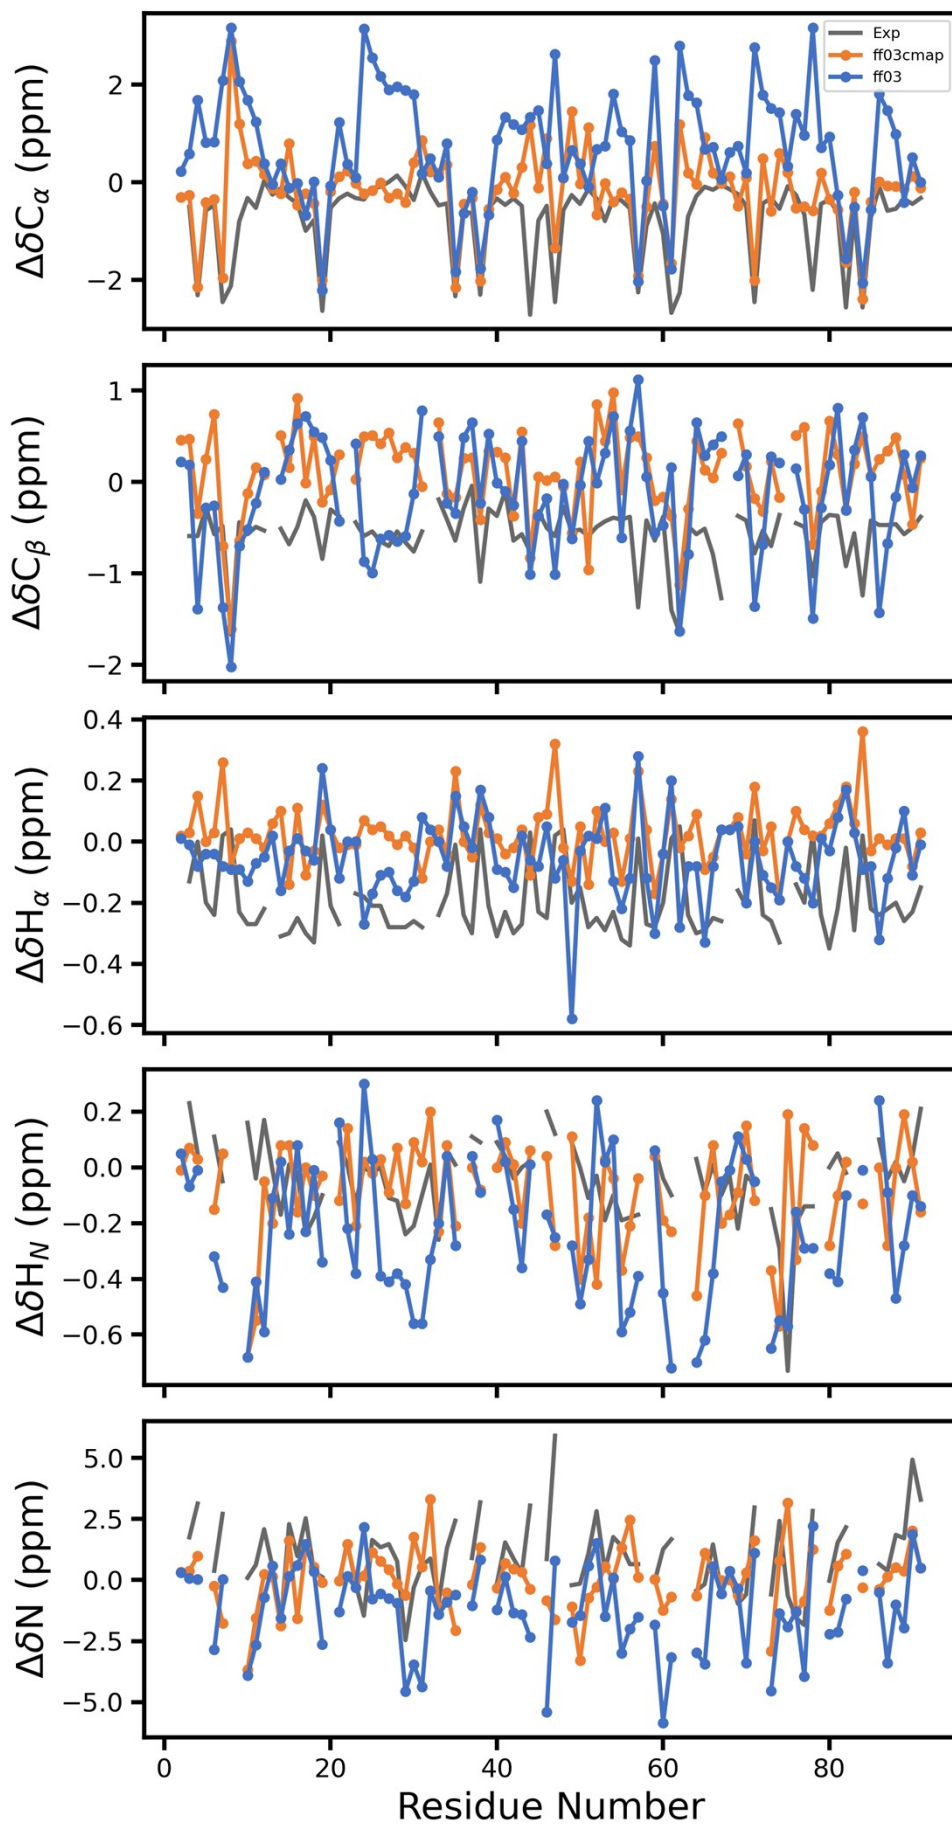

**Figure S5.** Secondary chemical shifts of simulation and experimental data for Sic1. Simulated and experimental secondary chemical shifts for (A) C $\alpha$ , (B) C $\beta$ , (C) N, (D) H $\alpha$  and (E) HN.



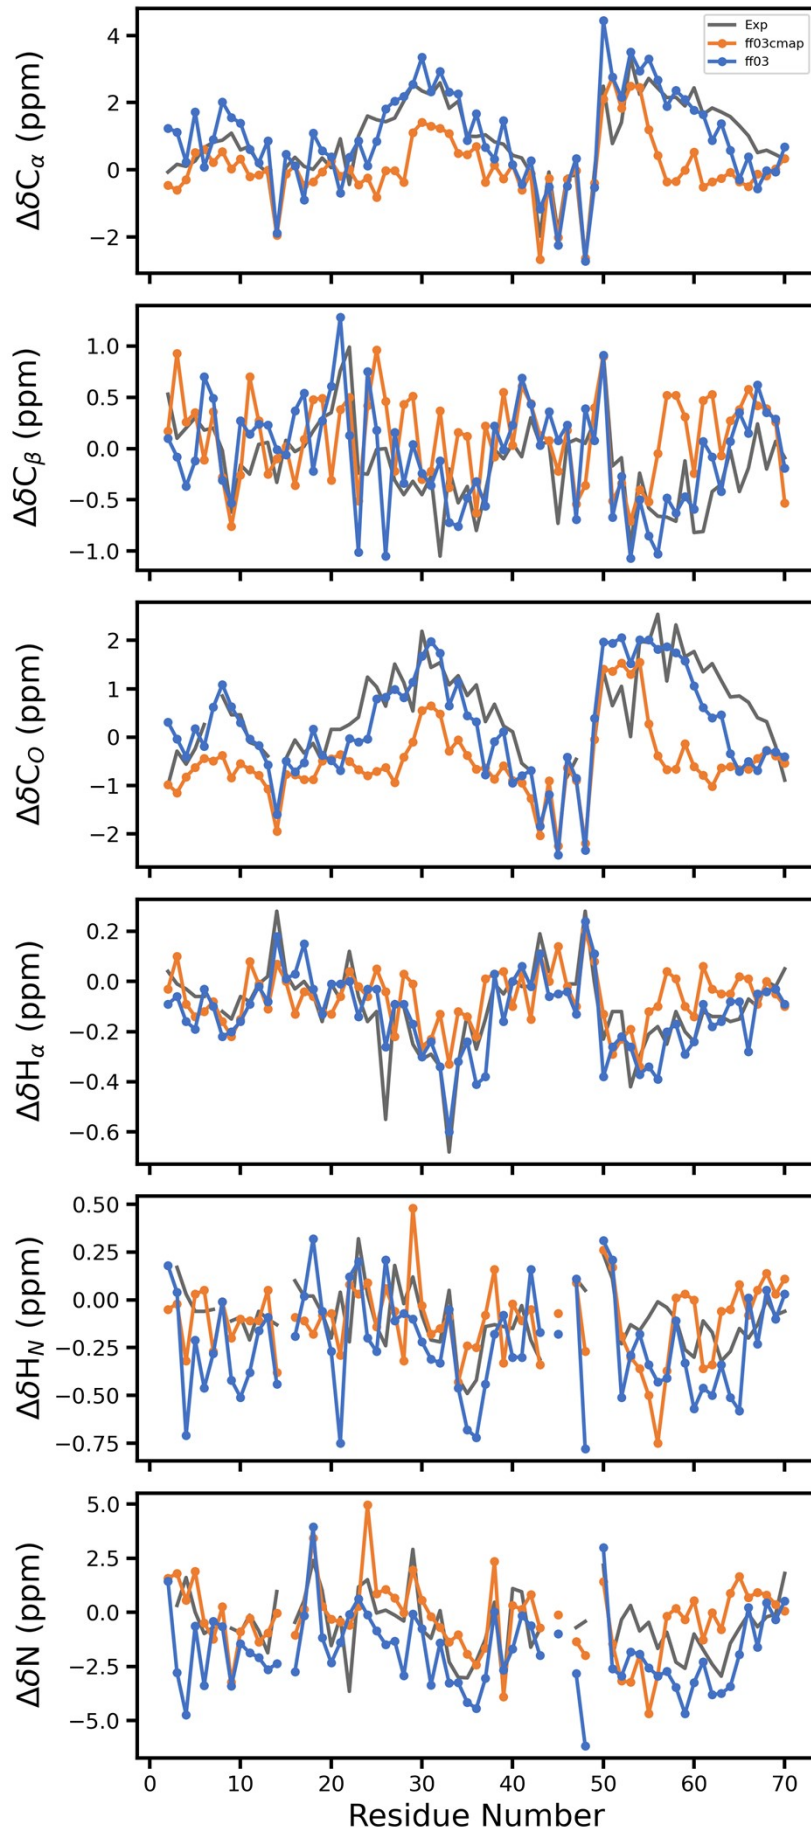

**Figure S6.** Secondary chemical shifts of simulation and experimental data for PaaA2. Simulated and experimental secondary chemical shifts for (A) C $\alpha$ , (B) C $\beta$ , (C) C, (D) N, (E) H $\alpha$  and (F) HN.

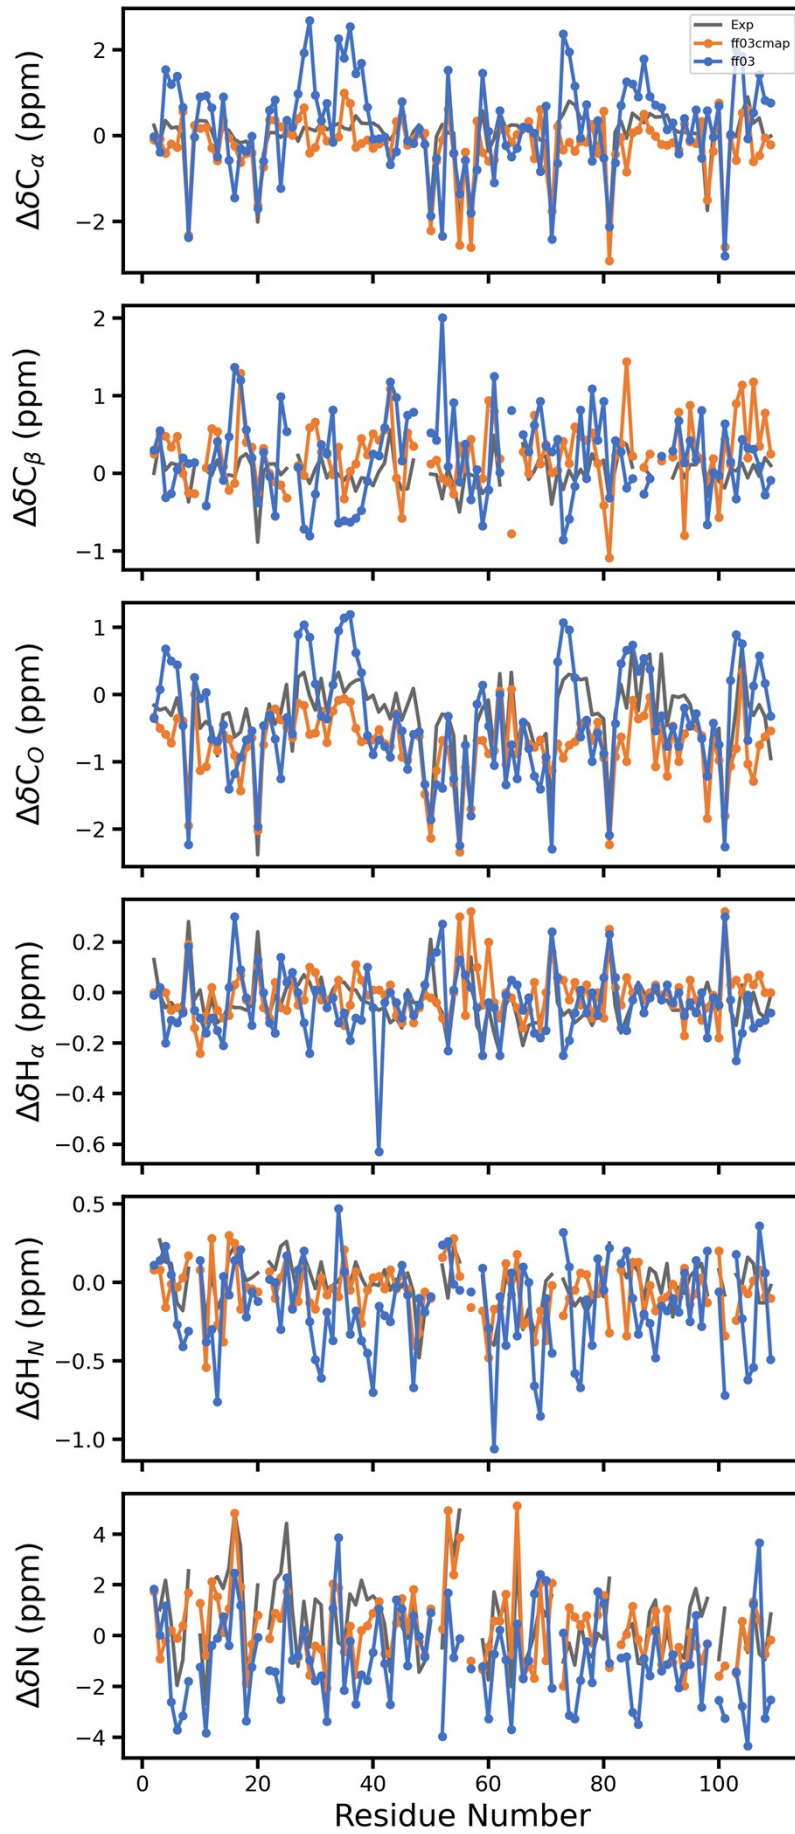

**Figure S7.** Secondary chemical shifts of simulation and experimental data for p15<sup>PAF</sup>. Simulated and experimental secondary chemical shifts for (A) C $\alpha$ , (B) C $\beta$ , (C) C, (D) N, (E) H $\alpha$  and (F) HN.

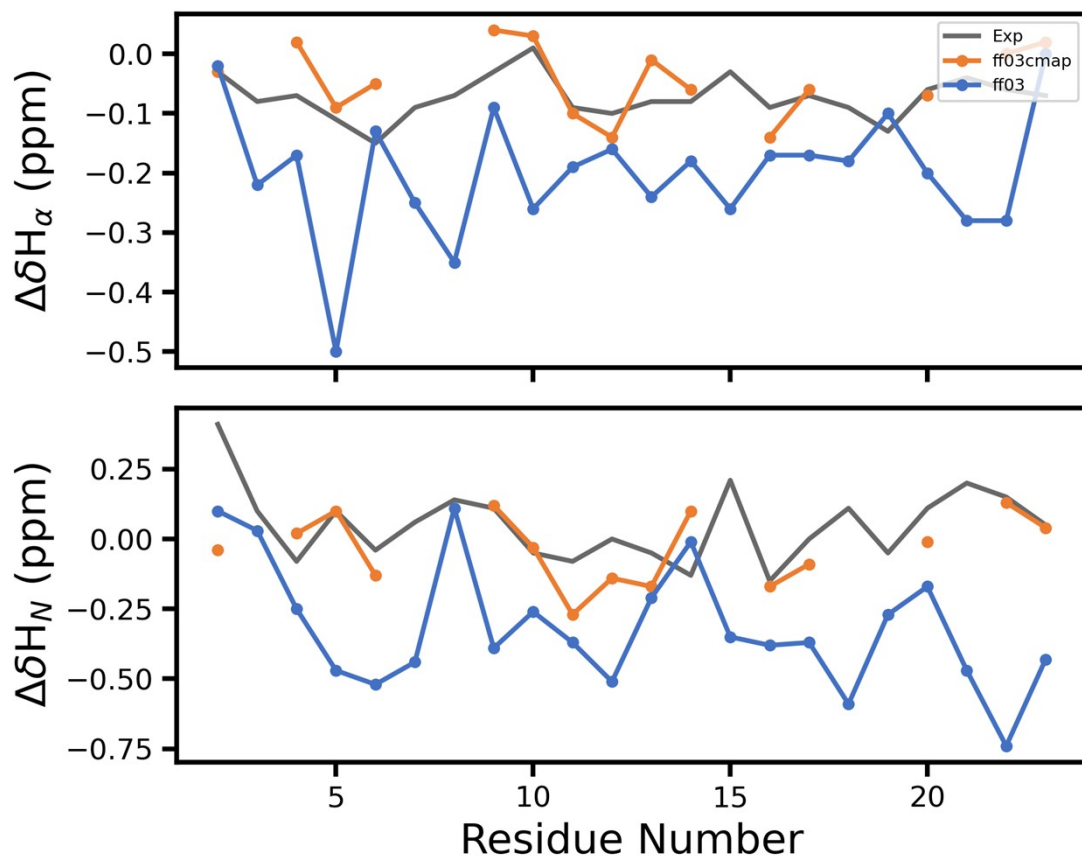

**Figure S8.** Secondary chemical shifts of simulation and experimental data for Histain5. Simulated and experimental secondary chemical shifts for (A) C $\alpha$ , (B) C $\beta$ , (C) C, (D) N, (E) H $\alpha$  and (F) HN.

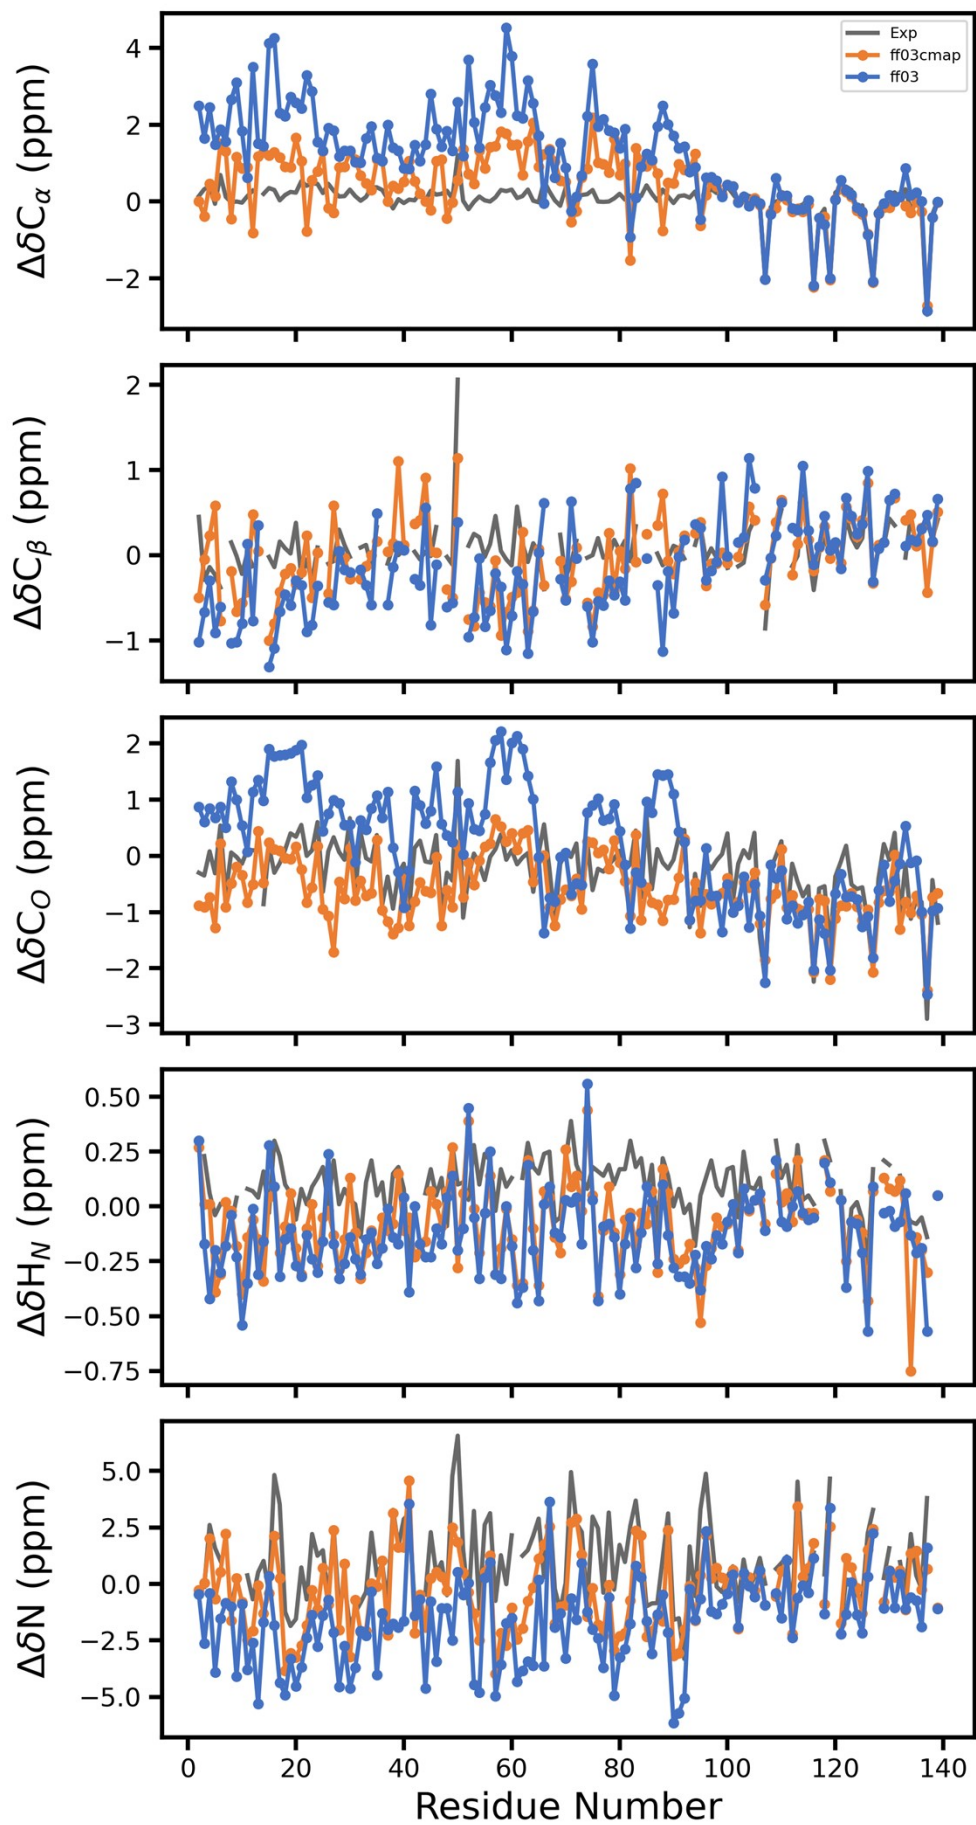

**Figure S9.** Secondary chemical shifts of simulation and experimental data for synuclein. Simulated and experimental secondary chemical shifts for (A) C $\alpha$ , (B) C $\beta$ , (C) C, (D) N, and (E) HN

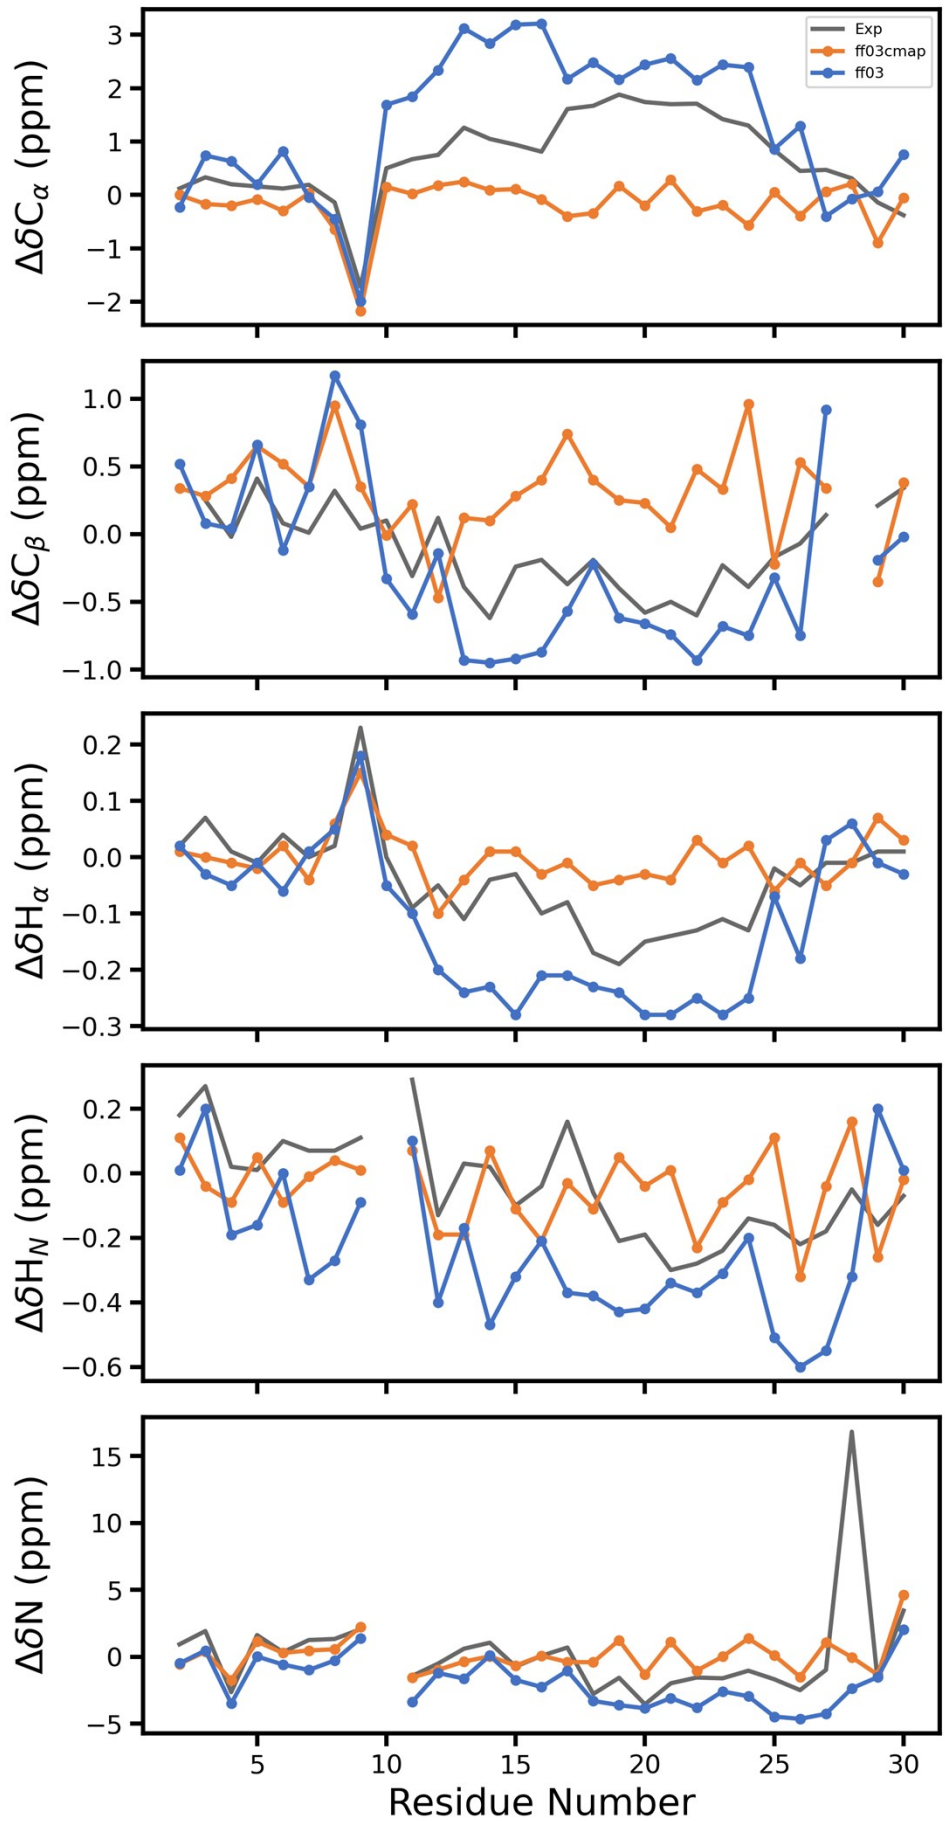

**Figure S10.** Secondary chemical shifts of simulation and experimental data for MeVN. Simulated and experimental secondary chemical shifts for (A) C $\alpha$ , (B) C $\beta$ , (C) N, (D) H $\alpha$  and (E) HN



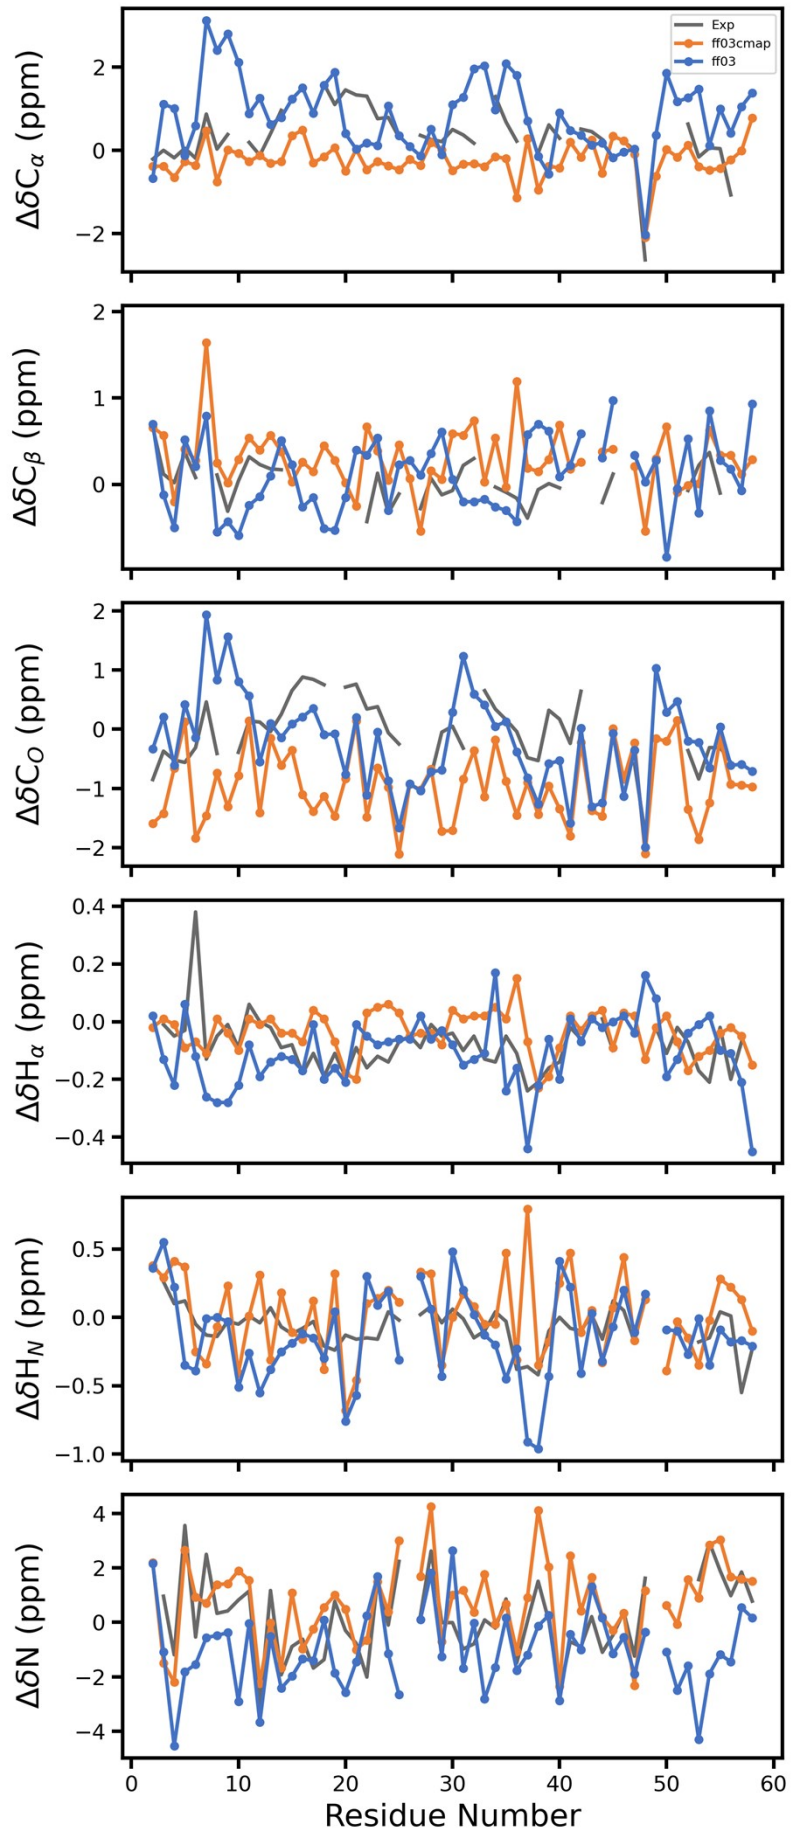

**Figure S11.** Secondary chemical shifts of simulation and experimental data for drkN. Simulated and experimental secondary chemical shifts for (A) C $\alpha$ , (B) C $\beta$ , (C) C, (D) N, (E) H $\alpha$  and (F) HN.

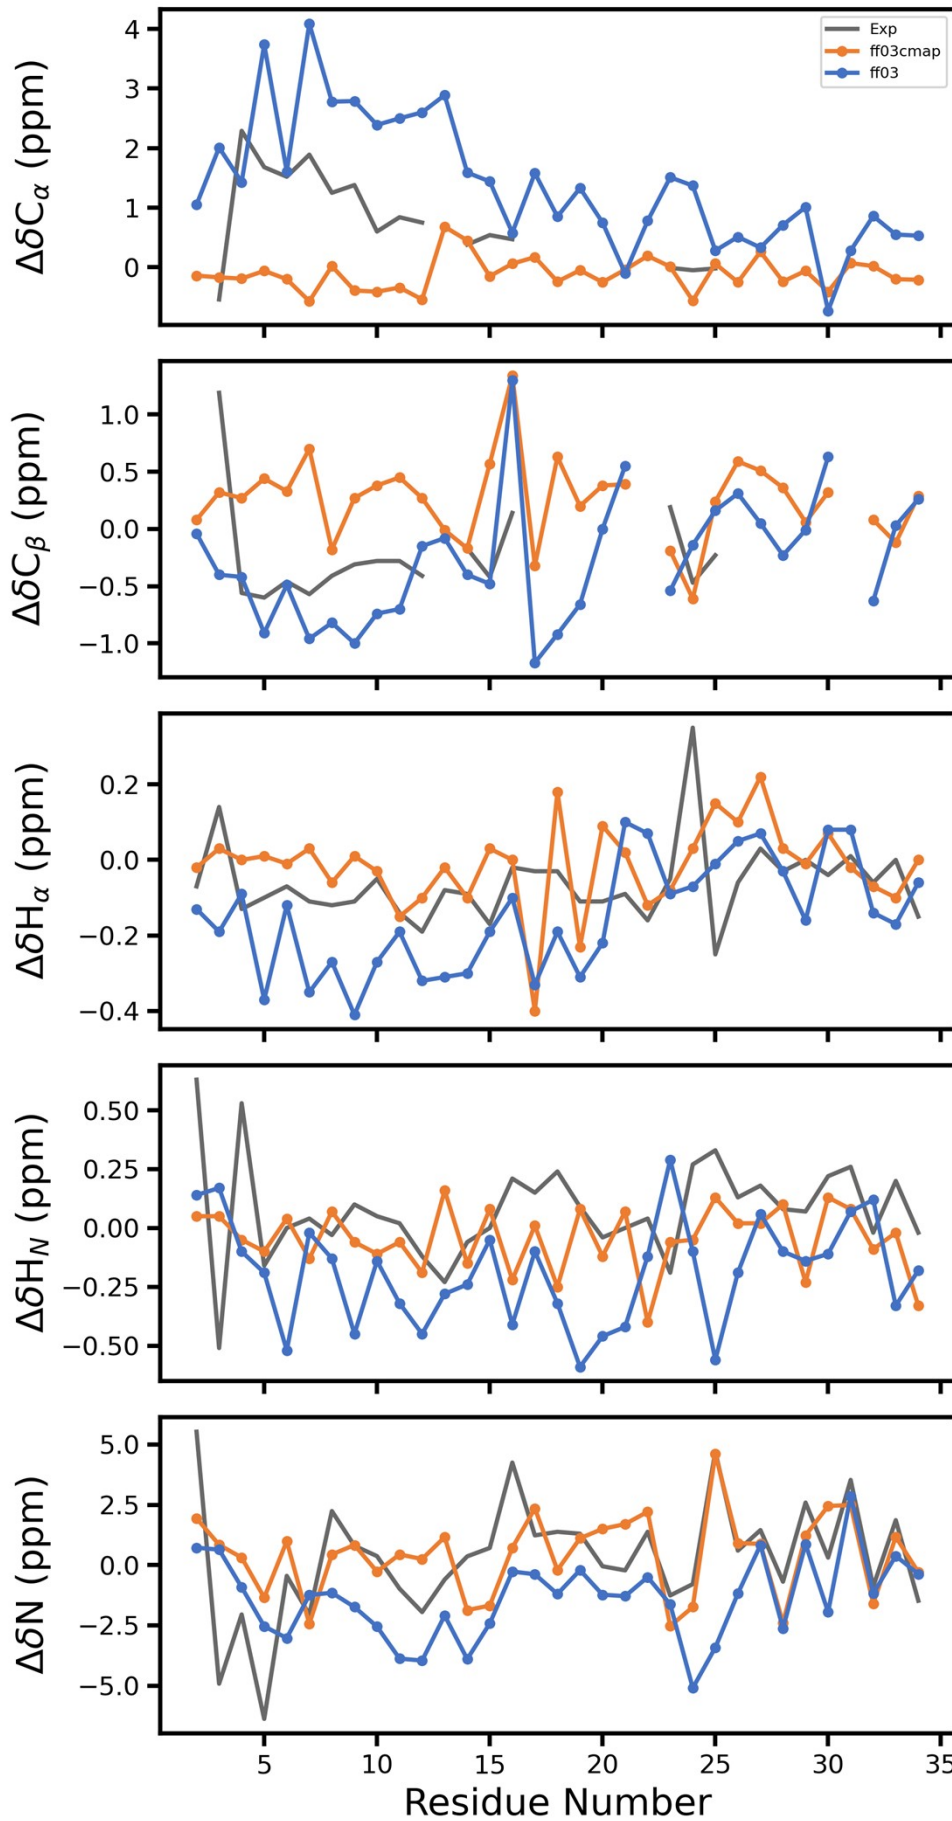

**Figure S12.** Secondary chemical shifts of simulation and experimental data for hIAPP. Simulated and experimental secondary chemical shifts for (A) C $\alpha$ , (B) C $\beta$ , (C) N, (D) H $\alpha$  and (E) HN.

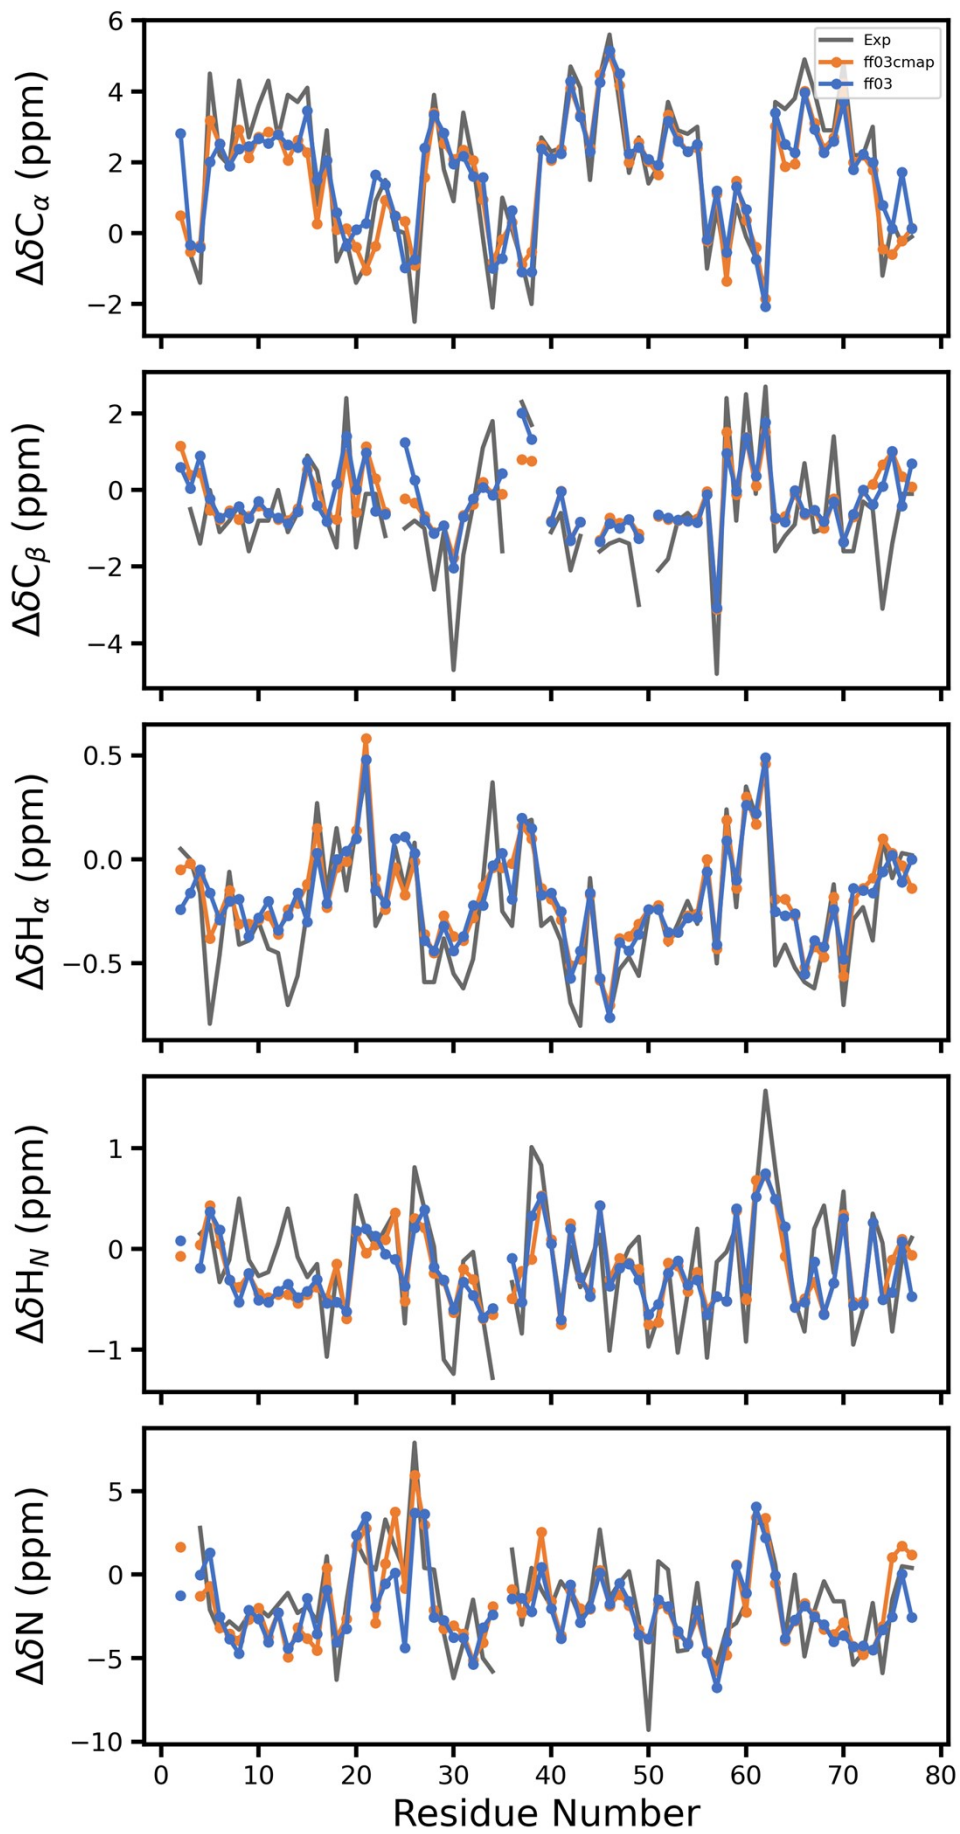

**Figure S13.** Secondary chemical shifts of simulation and experimental data for 2krk. Simulated and experimental secondary chemical shifts for (A) C $\alpha$ , (B) C $\beta$ , (C) N, (D) H $\alpha$  and (E) HN.

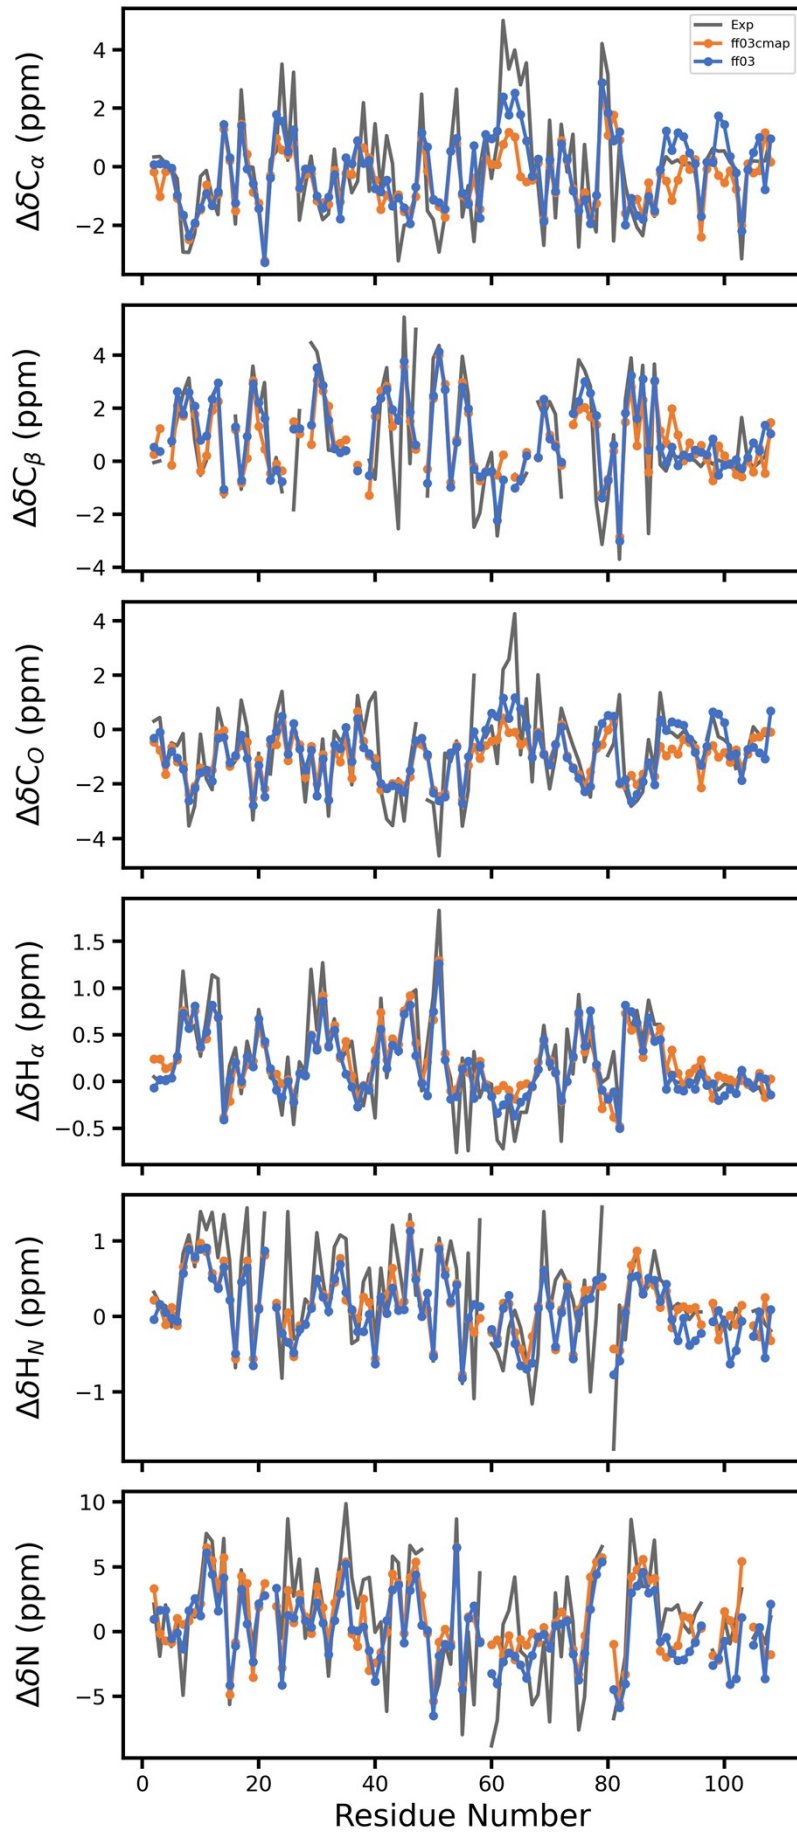

**Figure S14.** Secondary chemical shifts of simulation and experimental data for 2kpp. Simulated and experimental secondary chemical shifts for (A) C $\alpha$ , (B) C $\beta$ , (C) C, (D) N, (E) H $\alpha$  and (F) HN.

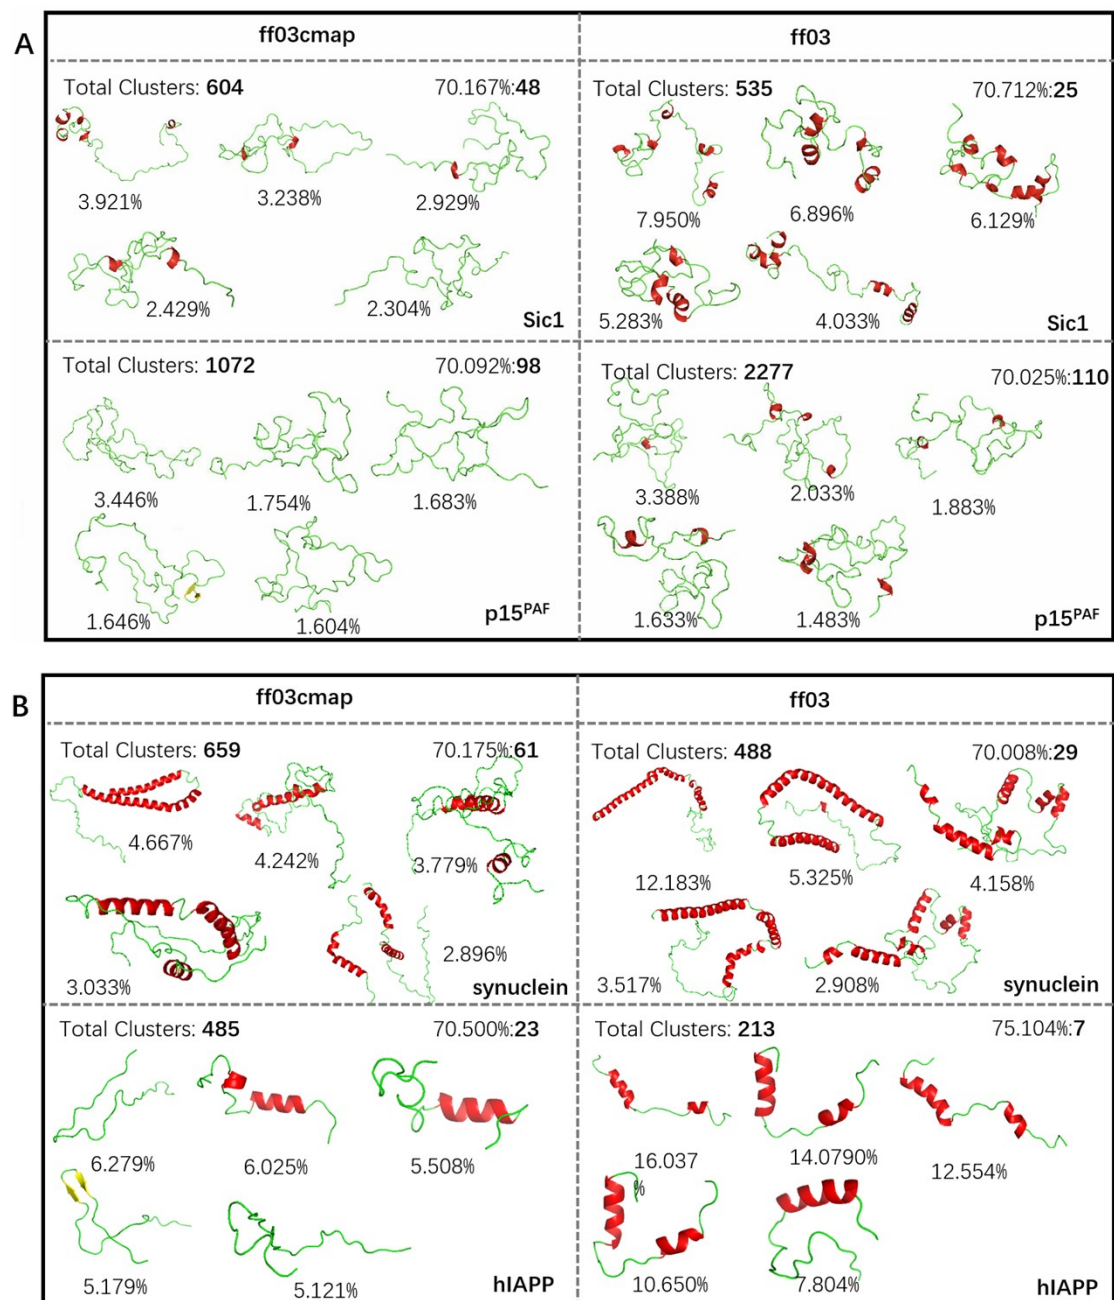



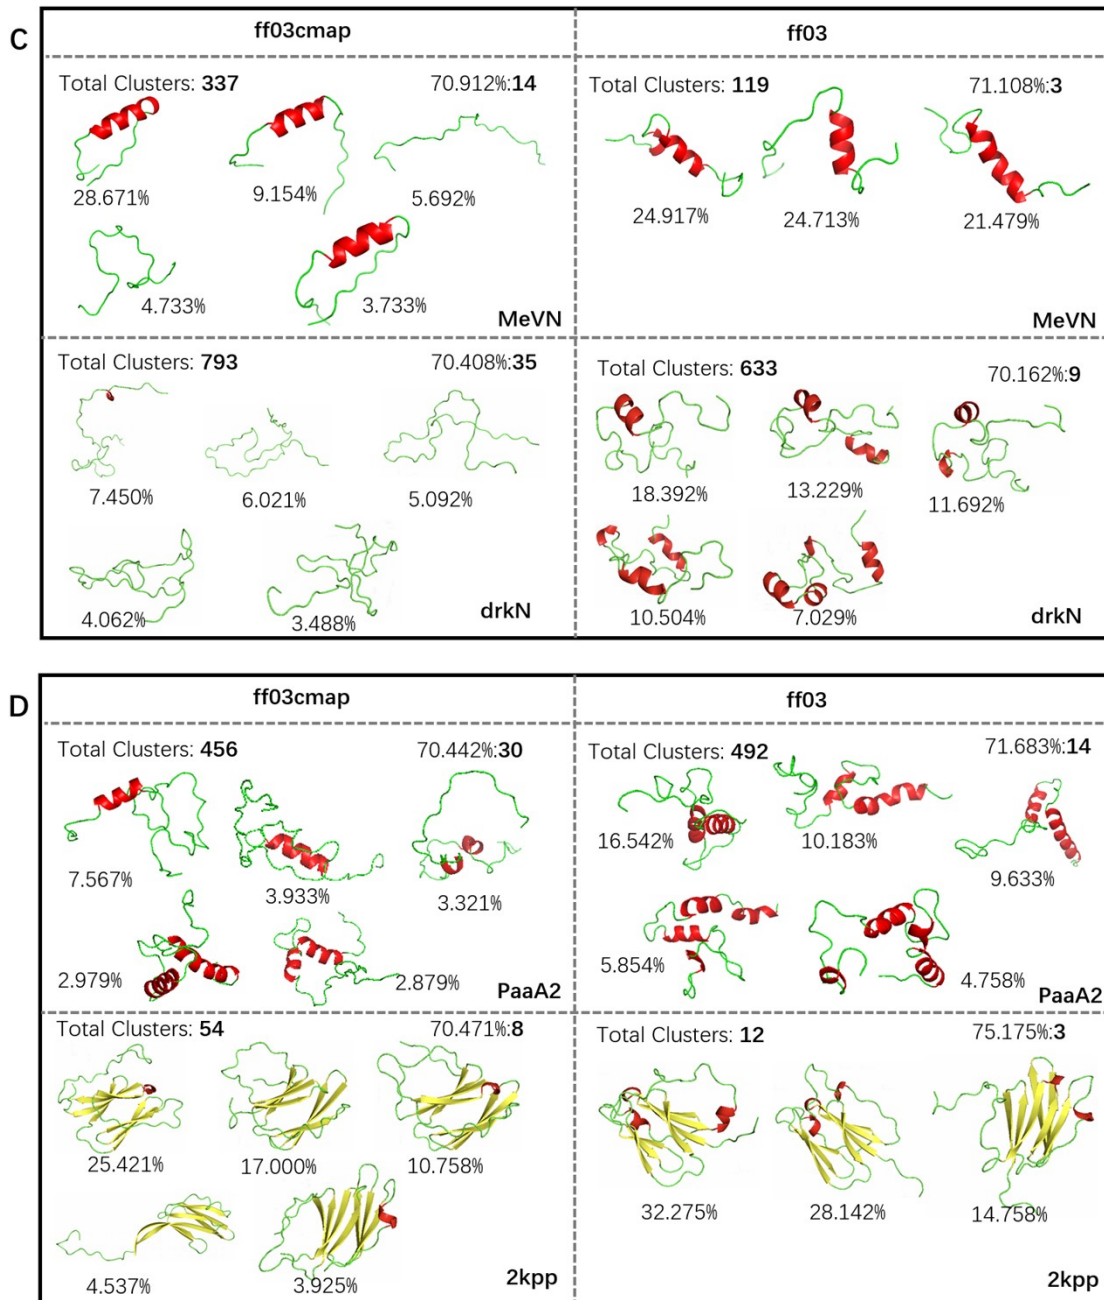

**Figure S15.** Representative conformers of the top-five clusters between ff03cmap and ff03 force fields for ten proteins. (A) Clusters of disordered proteins Sic1 and p15<sup>PAF</sup>. (B) Clusters of disordered proteins synuclein and hIAPP. (C) Clusters of disordered proteins MeVN and drkN. (D) Clusters of ordered proteins PaaA2 and 2kpp. The conformations on the left were simulated by ff03cmap, and those on the right were simulated by ff03. The numbers below the conformations show the populations for each cluster. The numbers on the conformations show the total number of cluster conformations and the total number of cluster conformations that account for the top 70 percent.

Table S1. Simulation condition for all tested protein system.

| <b>Protein</b> | <b>force filed</b> | <b>no.of traj.</b> | <b>Simulation time(ns)</b> | <b>Temperature/K</b> | <b>ions</b> | <b>waters</b> | <b>BMRB accession no.</b> |
|----------------|--------------------|--------------------|----------------------------|----------------------|-------------|---------------|---------------------------|
| drkN           | ff03cmap           | 3                  | 400                        | 298                  | 7           | 7325          | 25501                     |
|                | ff03               | 3                  | 400                        |                      |             |               |                           |
| Sic1           | ff03cmap           | 3                  | 400                        | 298                  | 68          | 25096         | 16657                     |
|                | ff03               | 3                  | 400                        |                      |             |               |                           |
| PaaA2          | ff03cmap           | 3                  | 400                        | 298                  | 86          | 9624          | 18840                     |
|                | ff03               | 3                  | 400                        |                      |             |               |                           |
| p15PAF         | ff03cmap           | 3                  | 400                        | 298                  | 17          | 18959         | 19332                     |
|                | ff03               | 3                  | 400                        |                      |             |               |                           |
| Histain5       | ff03cmap           | 3                  | 400                        | 303                  | 0           | 3990          | -                         |
|                | ff03               | 3                  | 400                        |                      |             |               |                           |
| synuclein      | ff03cmap           | 3                  | 400                        | 273                  | 87          | 32236         | 19337                     |
|                | ff03               | 3                  | 400                        |                      |             |               |                           |
| hIAPP          | ff03cmap           | 3                  | 400                        | 278                  | 0           | 3522          | 34069                     |
|                | ff03               | 3                  | 400                        |                      |             |               |                           |
| MeVN           | ff03cmap           | 3                  | 400                        | 293                  | 5           | 2797          | 6566                      |
|                | ff03               | 3                  | 400                        |                      |             |               |                           |
| 2krk           | ff03cmap           | 3                  | 400                        | 298                  | 0           | 7514          | 16640                     |
|                | ff03               | 3                  | 400                        |                      |             |               |                           |
| 2kpp           | ff03cmap           | 3                  | 400                        | 298                  | 33          | 9434          | 16563                     |
|                | ff03               | 3                  | 400                        |                      |             |               |                           |
